## Hippocampal Concentrations Drive Seizures in a Rat Model for Cefepime-induced Neurotoxicity

Emily Lesnicki (primary author)<sup>1</sup>, Gwendolyn M. Pais<sup>2,3</sup>, Sylwia Marianski<sup>4</sup>, Kimberly Valdez<sup>4</sup>, Zoe Gibson<sup>4</sup>, Jeffri Christopher<sup>4</sup>, Marc H. Scheetz<sup>2,3</sup> (corresponding author)

<sup>1</sup>College of Graduate Studies, Biomedical Science Program, Northwestern University, Downers Grove, IL, USA; <sup>2</sup>Department of Pharmacy Practice, Chicago College of Pharmacy, Northwestern University, Downers Grove, IL, USA; <sup>3</sup>Midwestern University, Chicago College of Pharmacy Pharmacometrics Center of Excellence, Downers Grove, IL, USA; <sup>4</sup>Chicago College of Pharmacy, Northwestern University, Downers Grove, IL, USA

Corresponding author E-mail: [mschee@midwestern.edu](mailto:mschee@midwestern.edu)

**Background:** In high dose, cefepime causes neurotoxicity in patients with kidney injury; however, the relationship between exposure and observed neurotoxicity is not clear, and no animal model presently recapitulates the human condition.

**Objectives:** This study sought to describe plasma and tissue pharmacokinetics and pharmacodynamics (PK/PD) of cefepime in rats experiencing neurotoxicity.

**Methods:** Male Sprague-Dawley rats (n=21) received escalating cefepime total daily doses ranging from 531-1593 mg/kg body weight/day administered as a short infusion (0.5 mL/min) every 24h for 5 days. Cefepime was quantified in plasma, cerebral cortex and hippocampus via liquid chromatography-tandem mass spectrometry (LC-MS/MS). Multiple PK/PD models of cefepime transit between plasma and brain compartments (i.e. cerebral cortex and hippocampus) and neurotoxic response were explored using Monolix 2021R1 (LixoftPK).

**Results:** Exposure estimation of cerebral cortex demonstrated a median (IQR)  $AUC_{0-24}$  and  $C_{max 0-24}$  of 181.8 (85.2-661.3) mg · 24 h/liter and 13.9 (1.0-30.1) mg/L, respectively. The median cerebral cortex/blood percentage of penetration was 1.7%. Exposure estimation of hippocampus demonstrated a median (IQR)  $AUC_{0-24}$  and  $C_{max 0-24}$  of 291.4 (126.6-1091.6) mg · 24 h/liter and 8.8 (3.4-33.4) mg/L, respectively. The median hippocampus/blood percentage of penetration was 4.5%. Rats that reached a cefepime  $C_{max}$  of  $\geq 17$  mg/L in the hippocampus exhibited signs of neurotoxicity. A hippocampal cefepime concentration of 4.1  $\mu$ g/100 mg brain tissue best described seizure stages >1 for cefepime-induced neurotoxicity.

**Conclusions:** A cefepime plasma  $AUC_{0-24}$  of 28,000 mg•24h/L and hippocampal concentrations of 4.1  $\mu$ g/100 mg brain tissue may be a threshold for cefepime-induced neurotoxicity. This model provides a methodology for future interrogation of the relationship between plasma concentrations, brain tissue concentrations, and neurotoxicity.

## 35 **Introduction**

36 Antimicrobial resistance is a growing public health challenge, with a world-wide 4.95 million  
37 associated deaths associated in 2019, and 1.27 million deaths directly attributed to resistance<sup>1</sup>.  
38 For many antibiotics, standard recommended doses are no longer effective and as a result,  
39 clinicians have few options but to use maximal antibiotic exposure to treat resistant infections  
40 and cure infections. However, higher doses carry additional toxicological risks.

41 Cefepime is a broad-spectrum, cephalosporin used to treat bacterial infections such as  
42 pneumonia, urinary tract infections, and skin infections commonly caused by gram-positive and  
43 gram-negative bacteria<sup>2</sup>. It is the 4<sup>th</sup> most commonly used Gram-negative antibiotic administered  
44 to hospital patients<sup>3</sup>. While a class effect of neurotoxicity is known for  $\beta$ -lactam agents such as  
45 cefepime<sup>4</sup>, cefepime in particular is associated with a high rate of neurotoxicity. A retrospective  
46 cohort study found a cumulative incidence of neurotoxicity of 41% with cefepime, 24% with  
47 meropenem, and 35% with piperacillin/tazobactam<sup>5</sup>. When comparing the convulsive activity of  
48 other  $\beta$ -lactams, cefepime is ~1.6 fold more pro-convulsive than penicillin and ~2x more than  
49 imipenem. Conversely, ceftriaxone is 10x less pro-convulsive than cefepime<sup>6</sup>. In 2012, The Food  
50 and Drug Administration issued a warning of seizure risk associated with cefepime use in  
51 patients suffering from renal impairment that do not receive appropriate dose adjustments<sup>7</sup>. Of  
52 the 59 individuals displaying neurotoxic outcomes, 58 of those patients had renal dysfunction,  
53 and 56 patients received a higher than recommended dose for their organ function. The safety of  
54 cefepime in certain patient populations has been routinely examined, especially after adverse  
55 effects have been observed at high rates within standard recommended dosing regimens.

## 56 **Clinical Pharmacology**

57 The standard adult dose of cefepime is 2 grams every 8 hours via intravenous infusion over 30  
58 minutes for common Gram-negative pathogens. The drug follows “linear” elimination kinetics; it  
59 has an observed half-life of 2 ( $\pm$ 0.3) hours and a total body clearance of 120 ( $\pm$ 8) mL/min in  
60 healthy adults<sup>2</sup>. Cefepime is primarily excreted by the kidneys, therefore patients with reduced  
61 renal function are more susceptible to increased exposures if doses are not decreased. Notably,  
62 kidney damage is the most common comorbidity among those suffering from cefepime  
63 neurotoxicity. Patients with kidney disease can have the cefepime half-life increase to 13 hours  
64 compared to patients with normal clearance<sup>8</sup>. The average age of patients suffering from  
65 cefepime neurotoxicity was 67 years old, equally affecting men (49%) and women (51%)<sup>9</sup>. The  
66 most observed clinical manifestations of cefepime neurotoxicity include loss of consciousness,  
67 aphasia, confusion, non-convulsive status epilepticus (NCSE), encephalopathy, seizure disorders,  
68 myoclonus, and other neuropsychiatric symptoms<sup>10, 11</sup>. In patients with NCSE,  
69 electroencephalographic (EEG) methods were used to observe altered brain activity, which  
70 showed tri-phasic, generalized slow, and multi-focal sharp waves, all of which are abnormal<sup>12</sup>.

71 Roughly 86% of the cefepime is recovered in the urine unchanged in patients with normal renal  
72 function<sup>13</sup>. In addition to renal excretion, cefepime is metabolized into N-methylpyrrolidine  
73 (NMP) and further into NMP-N-oxide and an epimer of cefepime. Studies suggest that penicillin  
74 related compounds are actively transported across the blood-brain-barrier<sup>14</sup>. Cefepime can  
75 penetrate the cerebral spinal fluid (CSF) with observed median CSF-plasma concentration ratios  
76 of 19%, as demonstrated in a pharmacokinetic rat model<sup>15</sup>. These results are in agreement with  
77 other animal studies<sup>16,17</sup>, as well as transit in humans<sup>18</sup>.

78 When the blood-brain-barrier permeability is disrupted, greater concentrations of the drug are  
79 likely to reach the brain, but especially as the degree of renal failure increases. Increased central  
80 nervous system (CNS) penetration has also been observed in patients with sepsis, CNS infection,  
81 and brain injury<sup>19</sup>. While there are data on penetration of cefepime in the CSF and plasma, little  
82 is known about accumulation in the brain and relationship with toxicity. The accumulation of  
83 cefepime in the brain may be the important driving factor linking cefepime and neurotoxicity.

84 The specific therapeutic plasma concentrations that define cefepime neurotoxicity are not clear;  
85 though, some have suggested trough concentrations  $> 22$  mg/L<sup>20</sup>; however, the precision of  
86 trough concentrations to predict neurotoxicity may not be accurate. The estimated mean  
87 probability of neurotoxicity at  $T_{>22}$  in one study was 51.4%, which is a rate far beyond what is  
88 seen in clinical practice<sup>21</sup>. Such a model could be used to simulate the human toxicity threshold  
89 as there is no threshold goal to date. The objectives of the current research are to gain a better  
90 understanding of the pharmacokinetic exposures resulting in neurotoxic endpoints.

### 91 **Mechanism of Neurotoxicity**

92 Although the mechanism contributing to cefepime induced neurotoxicity is not entirely  
93 understood, studies show that the adverse events may be at least partially mediated by cefepime  
94 binding to the gamma-aminobutyric acid (GABA<sub>A</sub>) receptor<sup>22, 23</sup>. Cefepime demonstrates a high  
95 binding affinity and binds competitively to the GABA<sub>A</sub> subtype receptors in a concentration  
96 dependent manner<sup>22</sup>. The inhibition of GABA receptor activation causes hyperexcitability,  
97 resulting in a lower seizure threshold<sup>22</sup>. However, other potential mechanisms of cefepime  
98 neurotoxicity likely exist to explain the higher rates of neurotoxicity.

### 99 **Models of Neurotoxicity**

100 Rodent models are routinely used to assess potential convulsive risk of  $\beta$ -lactam antibiotics.  
101 Researchers have administered various cephalosporins to test the range of convulsive effects of  
102  $\beta$ -lactam antibiotics. Several models of cefepime neurotoxicity have been established such as the  
103 PTZ method to chemically induce seizures by acting as a GABA inhibitor and electroconvulsive  
104 shock in corneal kindled mice to determine the convulsive liability of cefepime. The  
105 neurotoxicity outcome is quickly achieved by lowering the seizure threshold<sup>24</sup>. Similarly,  
106 intracerebral administration of cefepime also produces robust seizure responses within minutes<sup>23</sup>.  
107 A gap in literature is a clinically relevant animal model to define the systemic pharmacokinetic  
108 exposure that results in neurotoxicity, specifically in the context of renal impairment. The rodent  
109 model has high translational capacity due to similar brain structure and neurotransmitters, which  
110 is why it is used in various seizure models. However, a rodent model for neurotoxicity that  
111 delivers cefepime systemically does not yet exist.

112 Apart from renal impairment, brain injury or neurological disorders may also be risk factors for  
113 convulsive activity. Epilepsy can lower the seizure threshold, increasing the risk of cefepime-  
114 induced convulsions<sup>24</sup>. The symptoms consistent with neurotoxicity in these animal models  
115 include rolling, wild running, clonic convulsions, falling down, clonus of the forelimbs, and  
116 death<sup>22,23</sup>.

## 117 **Materials and Methods**

### 118 **Experimental design and animals**

119 The animal toxicology study was conducted at Midwestern University (IACUC 2793).

120 Male Sprague-Dawley rats (mean weight 260-300 g) were obtained from Envigo (Indianapolis,  
121 IN, USA).

### 122 **Chemicals and reagents**

123 Animals were administered clinical grade cefepime hydrochloride for injection (Apotex  
124 Corporation, Weston, FL, USA). Normal saline (Abbott Laboratories, Chicago, IL, USA) and  
125 heparin (Covetrus, Portland, ME, USA) were used in sampling methods. Folic acid (Sigma-  
126 Aldrich, St. Louis, MO, USA) dissolved in 0.3 mmol/L NaHCO<sub>3</sub> (VWR, Radnor, PA, USA) was  
127 used.

128 Analytical grade cefepime hydrochloride (Apotex Corporation, Weston, FL, USA) and  
129 ceftazidime (Acros Organics, NJ, USA) pentahydrate as an internal standard were used for liquid  
130 chromatography-tandem mass spectrometry (LC-MS/MS) assays. Milli-Q water was obtained  
131 from Aqua Solutions purified water dispensing system at Midwestern University. LC-MS/MS  
132 grade acetonitrile (VWR, Radnor, PA, USA), formic acid (VWR, Radnor, PA, USA), methanol  
133 (VWR, Radnor, PA, USA) and frozen, non-medicated, non-immunized, pooled Sprague-Dawley  
134 rat EDTA plasma (BioIVT, Westbury, NY, USA) were used to generate standard curves.

### 135 **Drug Administration**

136 Animals were temporarily anesthetized with 5% isoflurane via calibrated vaporizer with a  
137 charcoal canister and maintained on 2-3% isoflurane via nasal cone for approximately 3 minutes  
138 until all folic acid was administered intraperitoneally (IP) (divided into one or two doses).  
139 Cefepime was administered via single jugular vein catheter 30 minutes post folic acid.

### 140 **Experimental Protocol**

141 *Maximum human dosing pre-and post- acute kidney injury (AKI) (Aim 1):* Rats received 531  
142 mg/kg/day of cefepime (the allometric scaled dose from maximum human dosing is 86 mg  
143 /kg/day based on a package insert dose of 2000 mg three times daily for a 70 kg patient)<sup>2</sup> over  
144 approximately 2 minutes via jugular vein catheter. Folic acid (250 mg/kg) was administered IP in  
145 the hind limb while under isoflurane. Animals served as their own controls. Cefepime was dosed  
146 once daily and plasma samples were collected at various times before and after folic acid  
147 administration to mimic pre and post-AKI conditions.

148 *Maximum tolerated dosing (Aim 2):* Rats received increasing doses of cefepime ranging from  
149 500-2000 mg/kg/day as IV infusions given over approximately 2 minutes to determine the  
150 maximum tolerated dose (MTD)<sup>24</sup>. Folic acid (250 mg/kg) was administered IP on the first day  
151 prior to cefepime. The second group received the MTD of cefepime as a 0.5 mL/min infusion.  
152 Animals were observed for neurotoxic outcomes. Convulsive behavior was visually assessed  
153 according to the following modified Racine scale<sup>25</sup>: stage 0 no response, stage 1 ear and facial  
154 twitching, stage 2 myoclonic body jerks, stage 3 forelimb clonus and rearing, stage 4 clonic  
155 convulsions and turned on the side, stage 5 generalized clonic convulsions and turned on the  
156 back, stage 6 status epilepticus, and stage 7 loss of life. EEG activity was recorded to observe

157 cefepime signature of non-convulsive status epilepticus. Sampling procedures were repeated as  
 158 previously described.

159 *Seizure characterization after MTD cefepime exposures (Aim 3):* Rats received 250 mg/kg folic  
 160 acid IP in two divided doses, dissolved in 0.3 mmol/L sodium bicarbonate on the first day of  
 161 protocol and received 100 mg/kg folic acid each there thereafter to reduce renal function and  
 162 slow cefepime clearance. Rats received the MTD (either 1593 or 1250 mg/kg) of cefepime.  
 163 Animals were placed in metabolic cages each day, and urine was collected over 24-hour periods  
 164 over a period of 5 days. The experimental design is outlined in Figure 1. Convulsive behavior  
 165 was assessed by a modified Racine scale<sup>25</sup> as previously described. On the final day, rats were  
 166 anesthetized with 100mg/kg ketamine and 10 mg/kg xylazine IP. Terminal plasma and serum (1  
 167 mL) were collected. Tissues were perfused with chilled saline to prevent contamination with  
 168 circulating blood and brains were harvested. Serial sacrifice occurred before or during  
 169 convulsive episodes as outlined in Table 1. Seizure stages were determined by the last observed  
 170 seizure before brain harvest. Concentrations of cefepime are expressed as  $\mu\text{g}/100 \text{ mg}$  of brain  
 171 tissue.

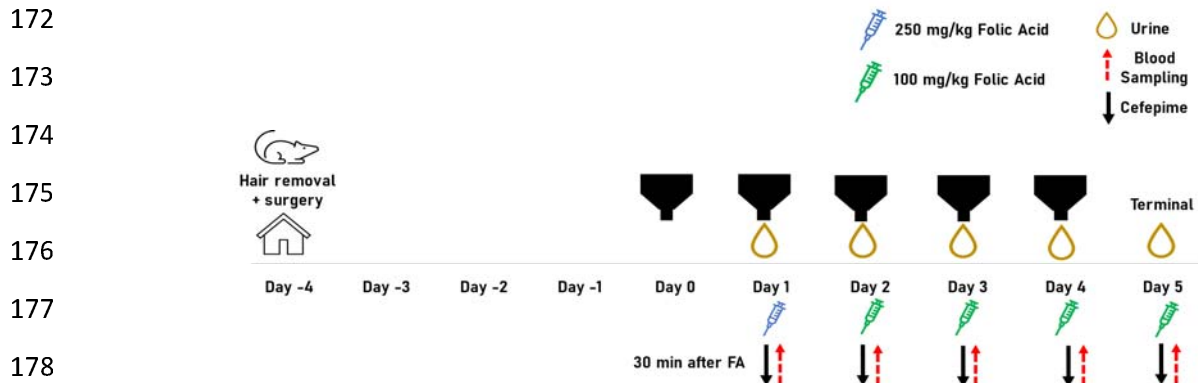

179 **Figure 1.** Experimental design timeline (Aim 3)

180

| Blood sample time relative to cefepime dose (min) |       |       |       |       |       |
|---------------------------------------------------|-------|-------|-------|-------|-------|
|                                                   | Day 1 | Day 2 | Day 3 | Day 4 | Day 5 |
|                                                   |       | 0     | 0     | 0     | 0     |
|                                                   | 15    | 15    | 15    | 15    | 15    |
|                                                   | 30*   | 30    | -     | -     | 30    |
|                                                   | 120*  | 120   | 120*  | 120   | 120*  |

186 **Table 1.** Sampling and serial sacrifice schedule. Sacrifice denoted by \*.

### 187 Blood collection

188 Double jugular vein cannulation surgery was performed, and animals were allowed to recover  
 189 four days prior to first day of sampling. Blood samples were drawn from a single jugular vein  
 190 catheter in a sedation free manner when possible and collected into EDTA tubes. Blood samples  
 191 of 0.15 mL were replaced with equivalent volume of normal saline to maintain euvoemia. Dilute  
 192 heparin (0.1 mL) was administered to prevent clotting. Samples were taken at various time points

193 (i.e. 15, 30, 60, and 120 minutes). Blood was centrifuged for 10 minutes at 3,000 g, plasma  
194 supernatant was collected, then stored at -80°C until analysis.

### 195 **Plasma Analysis**

196 Due to high cefepime concentrations in the plasma, samples were diluted (i.e. 136x, 62x, 32x, 8x,  
197 or 4x) with corresponding matrix so concentrations were within standard curve range. Standard  
198 curves were prepared using fresh cefepime and ceftazidime. Plasma samples volumes of 40  $\mu$ l  
199 were combined with 4  $\mu$ l of internal standard (10  $\mu$ g/ml ceftazidime) and subject to protein  
200 precipitation using 456  $\mu$ l methanol and 1% formic acid. Samples were centrifuged at 16,000g  
201 for 10 minutes at 4°C and 100  $\mu$ l supernatant was collected for analysis. The plasma  
202 concentrations were quantified by LC-MS/MS using standard curves for each matrix. Milli-Q  
203 water containing 0.1% formic acid and acetonitrile (flow rate of 0.5 ml/min) are used as aqueous  
204 (A) and organic (B) solvents, respectively, at the following ramping transitions: 0.00 min A  
205 (90%)  $\rightarrow$  B (10%), 1.50 min A (90%)  $\rightarrow$  B (10%), 2.50 min A (10%)  $\rightarrow$  B (90%), 5.40 min, A  
206 (10%)  $\rightarrow$  B (90%), 5.50 min A (90%)  $\rightarrow$  B (10%), and 10 min A (90%)  $\rightarrow$  B (10%). A Waters  
207 (2.1x100mm, 1.7 $\mu$ m) Acquity UPLC CSH C18 column (Agilent Technologies, Inc., Santa Clara,  
208 CA, USA) was utilized.

209

### 210 **Tissue Homogenization**

211 A BeadBug (Benchmark Scientific, Sayreville, NJ, USA) tissue homogenizer was used to  
212 homogenize cerebral cortex and hippocampus samples. Brain samples were first manually cut up  
213 into smaller pieces using dissecting scissors. Approximately 100 mg of cortex and hippocampus  
214 were placed into screw caps with a three-fold volume of sample weight of MilliQ, and Zirconium  
215 3.0 mm beads. Tissues underwent 3 cycles at 2500 rpm for 30 seconds with a 30 second rest  
216 interval repeated twice. Assays were prepared with brain homogenates using 40  $\mu$ l sample, 4 $\mu$ l  
217 of ceftazidime internal standard, and 456  $\mu$ l of 0.1% formic acid in methanol. Samples were  
218 centrifuged at 16000 g for 10 minutes at 4°C.

### 219 **Pharmacokinetic Modeling**

220 Plasma concentrations from Aim 1 experiments were used to run a one-compartmental linear  
221 elimination infusion model in Monolix. This model has fit the data well in preliminary studies.  
222 Clearance and volume of distribution parameters of cefepime were obtained from the fitted  
223 model and used to calculate half-life before and after kidney injury.

224 Plasma and tissue concentrations used to develop a physiologically based PK model in Monolix  
225 2021R1 (LixoftPK). Animals that were subjected to similar experimental protocols were used in  
226 the final model. Multiple PK/PD models of cefepime transit between plasma and brain  
227 compartments (i.e. cerebral cortex and hippocampus) and neurotoxic response were explored  
228 using Monolix. PK parameters and exposures during the first 24 hours (i.e., area under the  
229 concentration-time curve from 0 to 24 h [AUC<sub>0-24</sub>] and maximum concentration of drug in  
230 plasma from 0 to 24 h [C<sub>max0-24</sub>]) were calculated from Empiric Bayes Estimated concentrations  
231 given exact dosing schedules for each rat in Simulx (Lixoft). PK parameters from brain tissue  
232 were correlated with convulsive behavioral scores as described by a modified Racine scale<sup>25</sup>.

### 233 **Statistical Analysis**

234 All statistical analyses and graphics were generated using GraphPad Prism 9. Mean half-life of  
235 cefepime in pre and post-AKI conditions was analyzed by paired t-test. Analyses comparing  
236 mean cefepime concentrations and PK parameters in cortex and hippocampus of seizures stage  
237 groups ( $\leq 1$  or  $>1$ ), and differences in each cohort were done by independent t-test. All tests were  
238 two-tailed with statistical significance set at alpha 0.05.

## 239 RESULTS

### 240 Folic acid-induced AKI

241 Three animals were included in the initial pharmacokinetic analysis. A one-compartment linear  
242 elimination model fit the data well for plasma ( $R^2=0.92$ ). Mean half-life of cefepime for the pre-  
243 AKI condition was 0.382 hours and post-AKI mean half-life was 4.27 hours. The mean  
244 elimination half-life of cefepime increased with the presence of AKI, but differences pre and  
245 post folic acid treatment were not statistically significant; however, power was constrained  
246 (Figure 2). As these data were utilized to determine if kidney function was impacted with a new  
247 method of experimental kidney injury (i.e. folic acid), it was deemed that folic acid resulted in  
248 impairment of kidney function by a factor of ~10.

249 **Table 2** Parameter values from preliminary AKI model

| RAT ID | OCCASION | V     | Cl     | $K_{el}$ | $t_{1/2}$ Pre | $t_{1/2}$ Post |
|--------|----------|-------|--------|----------|---------------|----------------|
| 35     | 1        | 0.15  | 0.28   | 1.87     | 0.37          |                |
| 35     | 2        | 0.15  | 0.038  | 0.25     |               | 2.74           |
| 36     | 1        | 0.093 | 0.17   | 1.83     | 0.38          |                |
| 36     | 2        | 0.093 | 0.018  | 0.19     |               | 3.58           |
| 37     | 1        | 0.092 | 0.16   | 1.74     | 0.398         |                |
| 37     | 2        | 0.092 | 0.0098 | 0.11     |               | 6.51           |

250 Pharmacokinetic parameters estimated by Monolix (Lixoft) software for a one-compartment linear elimination  
251 model. Occasion defined as pre and post AKI. Abbreviations: AKI, acute kidney injury; V, volume of distribution;  
252 Cl, clearance of elimination;  $K_{el}$ , elimination constants (where  $K_{el} = Cl/V$ );  $t_{1/2}$ , elimination half-life (where  $t_{1/2} =$   
253  $0.693/K_{el}$ ).

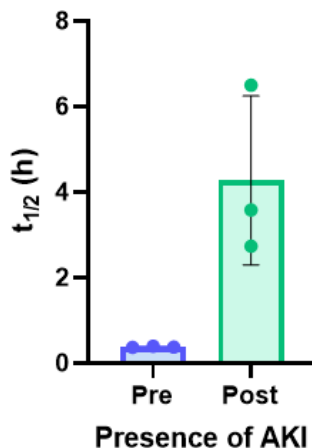

262 **Figure 2.** Impact of folic acid-induced AKI on the elimination half-life of cefepime. Values are expressed as mean ±  
263 SD, n=3 rats before and after folic acid administration. Pre AKI mean half-life is 0.382 hours and post mean half-life  
264 is 4.27 hours. Cefepime half-life was not significantly altered after folic acid ( $p=0.08$  by paired t-test).

### 265 Cefepime accumulation in the brain

266 Cefepime concentrations in the cerebral cortex and hippocampus were significantly higher in rats  
267 exhibiting seizure stages >1 ( $5.775 \pm 2.71 \mu\text{g}/100 \text{ mg}$  cortex tissue vs  $1.55 \pm 0.94 \mu\text{g}/100 \text{ mg}$   
268 cortex tissue,  $p < 0.0003$ , and  $6.85 \pm 2.583 \mu\text{g}/100 \text{ mg}$  hippocampal tissue vs  $1.38 \pm 0.76 \mu\text{g}/100$   
269 mg hippocampal tissue,  $p < 0.0001$ ). Cefepime concentrations in the hippocampus demonstrated a



270 clear cut-off at 4.1  $\mu\text{g}/100$  mg hippocampal tissue, for cefepime-induced neurotoxicity (Figure  
271 4).

## 272 Cefepime pharmacokinetic model

273 A total of 21 rats received cefepime and contributed PK data. All available plasma samples that  
274 were collected were used in model building and analysis. The final model was a three-  
275 compartmental model for plasma PK, cerebral cortex, and hippocampus (Figure 3). The median  
276 parameter values (with the coefficient of variation percentage [CV%]) for the rate constants to  
277 the cerebral cortex from the central compartment ( $K_{12}$ ), to the central compartment from the  
278 cerebral cortex compartment ( $K_{21}$ ), to the hippocampus from the central compartment ( $K_{13}$ ), to  
279 the central compartment from the hippocampus compartment ( $K_{31}$ ), were  $1.01\text{ h}^{-1}$ ,  $1.98\text{ h}^{-1}$   
280 [ $6.38\%$ ],  $0.15\text{ h}^{-1}$  [ $26.9\%$ ], and  $0.2\text{ h}^{-1}$  [ $46.5\%$ ], respectively. The model fit the data well for  
281 plasma with predictive performance of coefficients of determination ( $R^2$ ) were Bayesian [ $R^2 =$   
282  $0.60$ ] for plasma, Bayesian [ $R^2 = 0.99$ ] for cerebral cortex, and Bayesian [ $R^2 = 0.98$ ] for  
283 hippocampus (Figure 6).

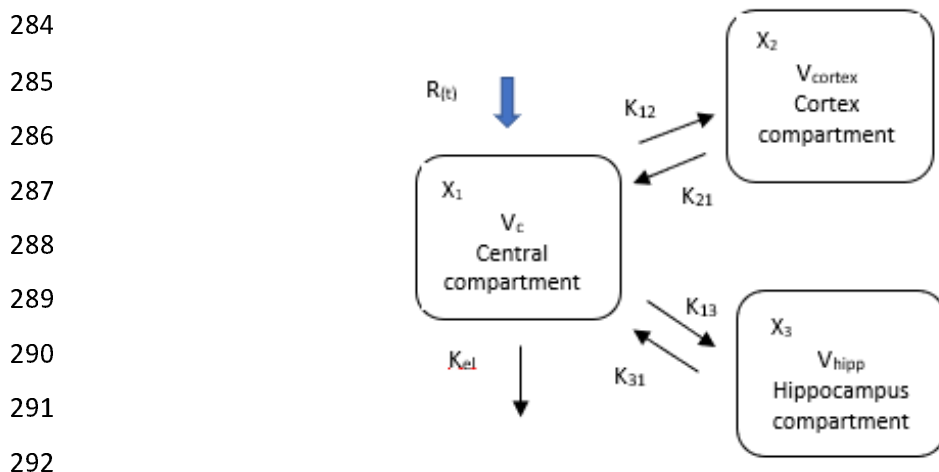

293 **Figure 3** Schematic of three-compartmental PK model. Abbreviations: PK, pharmacokinetic;  $R(t)$ , dose  
294 administration rate;  $K_{el}$ , elimination rate constant;  $V_c$ , volume of central compartment;  $V_{cortex}$ , volume of cerebral  
295 cortex compartment;  $V_{hipp}$ , volume of hippocampus compartment;  $K_{12}$ , rate constant to cortex from central  
296 compartment;  $K_{21}$ , rate constant to central from cortex compartment;  $K_{13}$ , rate constant to hippocampus  
297 compartment from central compartment;  $K_{31}$ , rate constant to central compartment from hippocampus compartment;  
298  $X_1$ , amount in central compartment;  $X_2$ , amount in cortex compartment;  $X_3$ , amount in hippocampus compartment.

## 299 Cefepime pharmacokinetic exposures and percent penetration

300 Exposure estimation revealed a plasma median [IQR] half-life,  $AUC_{0-24}$ , and  $C_{max\ 0-24}$ , of 2.2  
301 (1.1-5.8) h, 11916.5 (8060.5-32192.5)  $\text{mg} \cdot 24\text{ h}/\text{liter}$ , and 809.4 (110.7-1664.8)  $\text{mg}/\text{L}$  from the  
302 first dose, respectively. Exposure estimation of cerebral cortex demonstrated a median [IQR]  
303  $AUC_{0-24}$  and  $C_{max\ 0-24}$  of 181.8 (85.2-661.8)  $\text{mg} \cdot 24\text{ h}/\text{liter}$  and 13.9 (1.0-30.1)  $\text{mg}/\text{L}$ ,  
304 respectively. The median cerebral cortex/blood percentage of penetration was 1.7%. Exposure  
305 estimation of hippocampus demonstrated a median [IQR]  $AUC_{0-24}$  and  $C_{max\ 0-24}$  of 291.4 (126.6-  
306 1091.6)  $\text{mg} \cdot 24\text{ h}/\text{liter}$  and 8.8 (3.4-33.4)  $\text{mg}/\text{L}$ , respectively. The median hippocampus/blood  
307 percentage of penetration was 4.5%. PK exposures for the first 24 h described in Figure 5. The

308 complete pharmacokinetic exposures and percentages of cefepime penetration for all animals are  
 309 summarized in Tables 3 and 4.

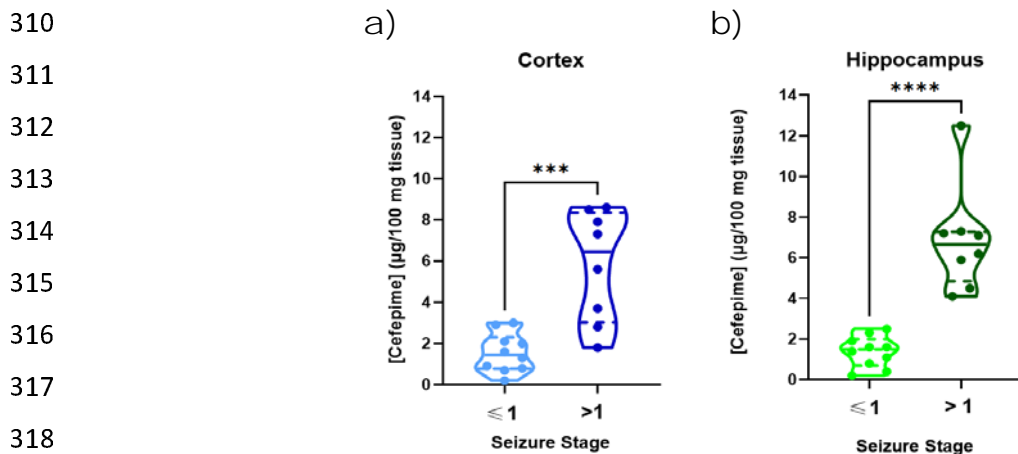

319 **Figure 4.** Concentrations of cefepime in the rat hippocampus and cerebral cortex relative to seizure stage. Cefepime  
 320 concentrations expressed as  $\mu\text{g}/100 \text{ mg}$  brain tissue. Concentrations in the (a) cerebral cortex and (b) hippocampus  
 321 were higher in rats exhibiting seizure stages  $>1$  ( $p = 0.0003$  and  $p < 0.0001$ , respectively, by student's t-test)  
 322 compared to rats exhibiting seizure stages  $\leq 1$ .

323 **Table 3.** Cefepime plasma, cerebral cortex, and hippocampus PK exposures estimated using Bayesian posteriors for  
 324  $\text{AUC}_{0-24}$  and  $\text{C}_{\text{max}0-24}$

| Animal        | $\text{AUC}_{0-24}$<br>( $\text{mg}\cdot\text{h}/\text{L}$ )<br>plasma | $\text{C}_{\text{max}0-24}$<br>( $\text{mg}/\text{L}$ )<br>plasma | $\text{AUC}_{0-24}$<br>( $\text{mg}\cdot\text{h}/\text{L}$ )<br>cortex | $\text{C}_{\text{max}0-24}$<br>( $\text{mg}/\text{L}$ )<br>cortex | $\text{AUC}_{0-24}$<br>( $\text{mg}\cdot\text{h}/\text{L}$ )<br>hippocampus | $\text{C}_{\text{max}0-24}$<br>( $\text{mg}/\text{L}$ )<br>hippocampus | $t_{1/2}$<br>(h) |
|---------------|------------------------------------------------------------------------|-------------------------------------------------------------------|------------------------------------------------------------------------|-------------------------------------------------------------------|-----------------------------------------------------------------------------|------------------------------------------------------------------------|------------------|
| 35            | 2349.81                                                                | 707.69                                                            | 45.99                                                                  | 13.16                                                             | 74.081                                                                      | 4.38                                                                   | 0.9              |
| 36            | 5293.99                                                                | 1329.18                                                           | 64.97                                                                  | 13.94                                                             | 105.050                                                                     | 4.98                                                                   | 1.31             |
| 37            | 8646.59                                                                | 1301.66                                                           | 125.75                                                                 | 17.23                                                             | 196.13                                                                      | 9.13                                                                   | 3.15             |
| 45            | 48805                                                                  | 1281.26                                                           | 1723.33                                                                | 46.54                                                             | 1425.84                                                                     | 51.17                                                                  | 13.86            |
| 46            | 38542.1                                                                | 809.39                                                            | 1502.36                                                                | 32.59                                                             | 1106.01                                                                     | 33.55                                                                  | 9.36             |
| 47            | 32329.3                                                                | 512.88                                                            | 1186.02                                                                | 19.55                                                             | 1077.18                                                                     | 26.82                                                                  | 6.3              |
| 48            | 11138.1                                                                | 1313.82                                                           | 75.40                                                                  | 13.26                                                             | 71.029                                                                      | 6.44                                                                   | 0.77             |
| 49            | 32055.6                                                                | 559.53                                                            | 695.51                                                                 | 12.59                                                             | 1253.48                                                                     | 33.32                                                                  | 5.33             |
| 50            | 8934.17                                                                | 14.99                                                             | 181.83                                                                 | 0.33                                                              | 254.15                                                                      | 1.59                                                                   | 1.155            |
| 51            | 29037.3                                                                | 3712.45                                                           | 628.18                                                                 | 69.97                                                             | 1278.2                                                                      | 50.67                                                                  | 4.076            |
| 52            | 6846                                                                   | 1903.06                                                           | 90.06                                                                  | 27.050                                                            | 114.67                                                                      | 7.53                                                                   | 0.72             |
| 53            | 11164.8                                                                | 2146.97                                                           | 353.93                                                                 | 61.74                                                             | 316.04                                                                      | 13.43                                                                  | 1.78             |
| 54            | 11916.5                                                                | 1793.33                                                           | 80.48                                                                  | 18.19                                                             | 90.205                                                                      | 7.86                                                                   | 0.7              |
| 55            | 28971.7                                                                | 3269.52                                                           | 214.79                                                                 | 27.55                                                             | 718.72                                                                      | 37.15                                                                  | 2.77             |
| 56            | 46125.5                                                                | 1536.19                                                           | 2493.59                                                                | 84.99                                                             | 2905.98                                                                     | 124.19                                                                 | 40.76            |
| 57            | 9380.96                                                                | 15.08                                                             | 50.35                                                                  | 0.087                                                             | 261.72                                                                      | 1.59                                                                   | 1.78             |
| 58            | 23682.4                                                                | 187.26                                                            | 204.04                                                                 | 1.70                                                              | 565.96                                                                      | 8.80                                                                   | 4.076            |
| 59            | 12505.4                                                                | 34.24                                                             | 101.71                                                                 | 0.30                                                              | 291.36                                                                      | 2.37                                                                   | 2.24             |
| 60            | 32517.7                                                                | 406.12                                                            | 288.93                                                                 | 3.77                                                              | 838.37                                                                      | 17.70                                                                  | 6.3              |
| 61            | 7474.34                                                                | 8.19                                                              | 111.745                                                                | 0.13                                                              | 160.76                                                                      | 0.80                                                                   | 1.36             |
| 62            | 6884.11                                                                | 6.43                                                              | 113.4                                                                  | 0.12                                                              | 138.50                                                                      | 0.64                                                                   | 0.98             |
| <b>Median</b> | 11916.5                                                                | 809.4                                                             | 181.8                                                                  | 13.9                                                              | 291.4                                                                       | 8.8                                                                    | 2.2              |
| <b>(IQR)</b>  | 8060.5-<br>32192.5                                                     | 110.7-<br>1664.8                                                  | 85.3-661.8                                                             | 1.0-30.1                                                          | 126.6-1091.6                                                                | 3.4-33.4                                                               | 1.1-5.8          |

325 Abbreviations:  $C_{\max 0-24}$ , maximum concentration at 24 h;  $AUC_{0-24}$ , area under the curve at 24 h;  $t_{1/2}$ , half-life; IQR,  
 326 interquartile range

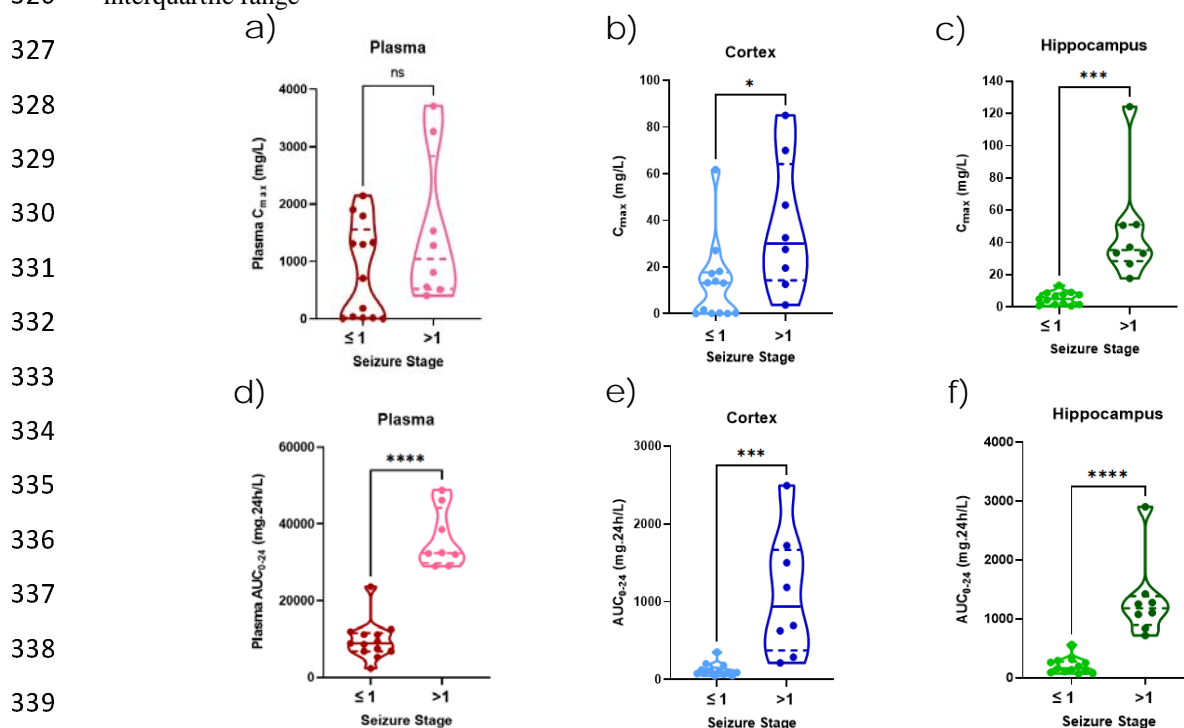

340 **Figure 5.** PK parameters and exposures during the first 24h calculated from Empiric Bayes Estimated concentrations estimated  
 341 every 0.1 hours given exact dosing schedules for each rat. Cefepime  $C_{\max 0-24}$  concentrations in the (b) cerebral cortex and (c)  
 342 hippocampus were significantly higher in rats exhibiting seizure stages >1 ( $p = 0.023$  and  $p = 0.0002$ , respectively). Cefepime  
 343  $AUC_{0-24}$  (mg·24/L) in (d) plasma ( $p < 0.0001$ ), (e) cerebral cortex ( $p = 0.0003$ ), and (f) hippocampus ( $p < 0.0001$ ) were  
 344 significantly higher in rats exhibiting seizure stages >1.

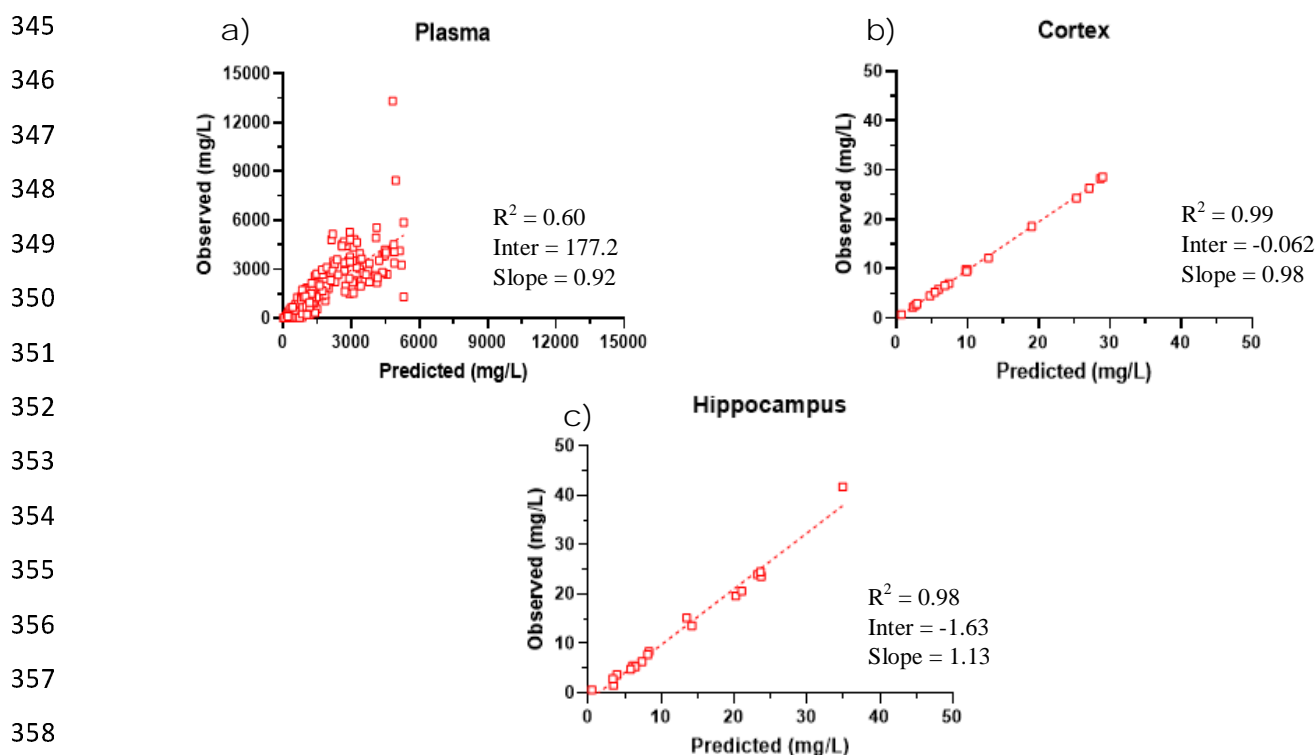

359 **Figure 6.** Observed versus predicted Bayesian plots from the [final] model for (a) plasma, (b) cerebral cortex, and  
 360 (c) hippocampus.

361

| Animal             | % penetration for cerebral cortex/plasma by: |                      | % penetration for hippocampus/plasma by: |                      |
|--------------------|----------------------------------------------|----------------------|------------------------------------------|----------------------|
|                    | AUC <sub>0-24</sub>                          | C <sub>max0-24</sub> | AUC <sub>0-24</sub>                      | C <sub>max0-24</sub> |
| 35*                | 1.95                                         | 1.85                 | 3.15                                     | 0.61                 |
| 36*                | 1.22                                         | 1.04                 | 1.98                                     | 0.37                 |
| 37*                | 1.45                                         | 1.32                 | 2.26                                     | 0.70                 |
| 45                 | 3.53                                         | 3.63                 | 2.92                                     | 3.99                 |
| 46                 | 3.89                                         | 4.02                 | 2.86                                     | 4.14                 |
| 47                 | 3.66                                         | 3.81                 | 3.33                                     | 5.22                 |
| 48                 | 0.67                                         | 1.01                 | 0.63                                     | 0.49                 |
| 49                 | 2.16                                         | 2.24                 | 3.91                                     | 5.95                 |
| 50                 | 2.03                                         | 2.20                 | 2.84                                     | 10.57                |
| 51                 | 2.16                                         | 1.88                 | 4.40                                     | 1.36                 |
| 52                 | 1.31                                         | 1.42                 | 1.67                                     | 0.39                 |
| 53                 | 3.17                                         | 2.87                 | 2.83                                     | 0.62                 |
| 54                 | 0.67                                         | 1.01                 | 0.75                                     | 0.43                 |
| 55                 | 0.74                                         | 0.84                 | 2.48                                     | 1.13                 |
| 56                 | 5.40                                         | 5.53                 | 6.30                                     | 8.08                 |
| 57                 | 0.53                                         | 0.57                 | 2.78                                     | 10.57                |
| 58                 | 0.86                                         | 0.90                 | 2.38                                     | 4.69                 |
| 59                 | 0.81                                         | 0.87                 | 2.32                                     | 6.92                 |
| 60                 | 0.88                                         | 0.92                 | 2.57                                     | 4.35                 |
| 61                 | 1.49                                         | 1.62                 | 2.15                                     | 9.82                 |
| 62                 | 1.64                                         | 1.79                 | 2.01                                     | 9.97                 |
| Median (IQR)       |                                              |                      |                                          |                      |
| Including animals  | 1.5 (0.84-2.7)                               | 1.6 (0.97-2.6)       | 2.6 (2.1-3.0)                            | 4.1 (0.6-7.5)        |
| Excluding animals* | 1.6 (0.8-3.3)                                | 1.7 (0.9-3.1)        | 2.7 (2.1-3.0)                            | 4.5 (1.0-8.5)        |

362 **Table 4.** Percent of cefepime penetration

363

364 Abbreviations: C<sub>max 0-24</sub>, maximum concentration at 24 h; AUC<sub>0-24</sub>, area under the curve at 24 h; t<sub>1/2</sub>, half-life; IQR,  
 365 interquartile range.

366 \*No cerebral cortex or hippocampus samples were collected in these animals.

## 367 Discussion

368 We induced kidney injury in rats and identified important exposure response relationships  
369 between cefepime and seizure stage. Hippocampal concentrations best described seizure stages  
370 >1 for cefepime-induced neurotoxicity. Previous research has demonstrated that when cefepime  
371 is administered intracerebrally, seizure responses are robust<sup>23</sup>, however, was unclear how much  
372 of the drug gets into the brain when administered systemically. We found that a cefepime plasma  
373  $AUC_{0-24}$  around 28,000 mg·24h/L corresponded to a hippocampal concentration of 4.1 µg/100  
374 mg brain tissue in animals exhibiting greater seizure activity (seizure stages >1). The estimated  
375  $C_{max0-24}$  exposure was significantly higher for animals experiencing neurotoxic outcomes in the  
376 cortex and the hippocampus. These effects were most apparent in the hippocampal analysis,  
377 suggesting that hippocampal cefepime concentrations are responsible for driving seizures. The  
378 corresponding  $AUC_{0-24}$  cefepime plasma and cortex may also be linked to seizure outcome.  
379 Future work will be required to better understand the full relationships between plasma  
380 concentrations, various brain tissue concentrations, and neurotoxicity.

381 In our study we found a greater median hippocampus/blood percent penetration of 4.5% by  
382  $C_{max0-24}$ , which was greater than the cerebral cortex/ blood penetration. Previous PK rat models  
383 showed that the median CSF/blood percentage of penetration of cefepime by  $AUC_{0-24}$  was 19%  
384 and 3% by  $C_{max0-24}$ <sup>15</sup>. Similarly, other animal studies evaluated the transit of cefepime to the  
385 target areas have demonstrated cefepime CSF concentrations between 16.2 and 36%<sup>16,17</sup>. The  
386 data are also consistent with findings in human subjects, which found a percent penetration of  
387 23% to the CSF<sup>18</sup>. Brain concentration findings in humans are more rare as tissue is difficult to  
388 obtain. However, microdialysis studies with other β-lactams demonstrate that brain  
389 concentrations are in line with class effects<sup>26</sup>. The PK of the parent compound has been  
390 evaluated extensively, but future studies should also consider the PK of the metabolites.

391 Our research identified that rats did not become neurotoxic in the absence of kidney injury in  
392 preliminary experiments. Renal impairment is a known risk factor of cefepime neurotoxicity, and  
393 the half-life of cefepime increased when AKI was present. Large doses of folic acid causes  
394 crystallization of the proximal tubule in the rat and has demonstrated to be an effective method to  
395 recreate the condition in the animal model.

396 PK-PD modeling has been useful in early stages of drug development and is an important tool  
397 for determining the efficacy and safety of a drug. By doing so, we can better understand toxicity  
398 outcomes and define the thresholds for toxicity. Animal models are frequently used in the PK  
399 evaluation of antimicrobial therapies. Although the PK of cefepime has been defined, the full  
400 PK/PD drivers are not well understood. This is the first study that quantitatively describes the  
401 transit of cefepime from the plasma to the cerebral cortex and hippocampal brain regions in rats  
402 experiencing neurotoxicity. This systemic exposure model is clinically relevant as the rat PK/PD  
403 model can be used to simulate the human toxicity threshold.

404 The mechanism for the CNS effects of cefepime remains unclear. The proposed explanation is  
405 attributed to its ability to cross the blood–brain barrier to bind competitively to the GABAergic  
406 receptor to suppress inhibitory neurotransmission<sup>22</sup>. Another suggested pathophysiology of these  
407 effects is a dysregulated lipid metabolism. Because the brain is a lipid-rich organ, dysregulated  
408 homeostasis may contribute to the development of cefepime neurotoxicity<sup>27</sup>. Cefepime has been  
409 found to dysregulate the glycerophospholipid profile in the corpus striatum in mice receiving

410 intraperitoneal injection. The number of dysregulated lipids increased after 5 days of exposure  
411 and changes in composition and structure were also observed. Moreover, the proportion of  
412 GABAergic neurons are high in the cortex and hippocampus but may be higher within the  
413 striatum<sup>27</sup>. This area may be more sensitive to cefepime treatment. Our study did not have  
414 adequate brain samples to isolate and analyze the corpus striatum. Further studies are warranted.

415 There are several limitations in this study. Some animals did not contribute complete data;  
416 however, all available samples were used to inform the model. Also, experimental protocols  
417 differed slightly for the various studies reported here. As such individual PK models were  
418 created for animals treated in different protocols. For future pharmacodynamic analyses we will  
419 want to include every animal to assess for toxicity. In our study only single daily doses of  
420 cefepime were given, thus is unknown whether multiple daily doses demonstrate concentration  
421 mediated changes to cerebral cortex and hippocampus transit.

422 In summary, this data has provided insight on the neurotoxicity threshold. The integrated animal  
423 data and PK models may have direct implications for human health outcomes and can provide a  
424 framework for optimal treatments regimens, especially in the setting of increasing antimicrobial  
425 resistance.

426 **Acknowledgements**

427 I'd like to thank my mentor, Dr. Marc Scheetz and committee members, Dr. Gwendolyn Pais and  
428 Dr. Annette Gilchrist for their expertise and guidance throughout this thesis project as well as lab  
429 members Dr. Patti Engel, Dr. Roxane Rohani, Dr. Jack Chang, Dr. Nathaniel Rhodes, Sylwia  
430 Marianski, Kimberly Valdez, and Zoe Gibson for their collaboration on the project. I would also  
431 like to thank the MWU Animal Facility and Research Core Facility.

432 **Funding**

433 This research was supported by the Midwestern University Biomedical Sciences Department and  
434 via equipment in the Midwestern University CORE center. Intramural funding was received  
435 from CCP.

436 **Transparency declarations**

437 None to declare.

## 438 References

- 439 1. **Antimicrobial Resistance Collaborators.** Global burden of bacterial antimicrobial  
440 resistance in 2019: a systematic analysis. *Lancet* 399(10325): 629–655, 2022
- 441 2. Maxipime. Package insert. Bristol-Myers Squibb Company; 2009.
- 442 3. Antimicrobial Use in US Hospitals: Comparison of Results From Emerging Infections  
443 Program Prevalence Surveys, 2015 and 2011. *Clin Infect Dis.* 2021.
- 444 4. **Snavely SR, Hodges G.** The neurotoxicity of antibacterial agents. *Annals of Internal*  
445 *Medicine* 101: 92-104, 1984.
- 446 5. **Haddad NA, Schreier DJ, Fugate JE, et al.** Incidence and Predictive Factors Associated  
447 with Beta-Lactam Neurotoxicity in the Critically Ill: A Retrospective Cohort Study.  
448 *Neurocrit Care* 10.1007/s12028-022-01442-1, 2022
- 449 6. **Roger C, Louart B.** Beta-Lactams Toxicity in the Intensive Care Unit: An Underestimated  
450 Collateral Damage?. *Microorganisms* 9(7): 1505, 2021
- 451 7. **FDA Drug Safety Communication.** Cefepime and risk of seizure in patients not receiving  
452 dosage adjustments for kidney impairment. Silver Spring MD: Food and Drug  
453 Administration, 2012.
- 454 8. **Barbhaiya RH, Knupp CA, Forgue ST, Matzke GR, Halstenson CE, Opsahl JA, and**  
455 **Pittman KA.** Disposition of the cephalosporin cefepime in normal and renally impaired  
456 subjects. *Drug Metab Dispos* 19: 68-73, 1991.
- 457 9. **Appa AA, Jain R, Rakita RM, Hakimian S, and Pottinger PS.** Characterizing Cefepime  
458 Neurotoxicity: A Systematic Review. *Open Forum Infect Dis* 4: ofx170, 2017.
- 459 10. **Durand-Maugard C, Lemaire-Hurtel AS, Gras-Champel V, Hary L, Maizel J,**  
460 **Prud'homme-Bernardy A, Andrejak C, Andrejak M.** Blood and CSF monitoring of  
461 cefepime-induced neurotoxicity: nine case reports. *J Antimicrob Chemother* 67: 1297-1299,  
462 2012.
- 463 11. **Grill MF, Maganti R.** Cephalosporin-induced neurotoxicity: clinical manifestations,  
464 potential pathogenic mechanisms, and the role of electroencephalographic monitoring. *Ann*  
465 *Pharmacother* 42: 1843-1850, 2008.
- 466 12. **Tamune H, Hamamoto Y, Aso N, Yamamoto N.** Cefepime-induced encephalopathy:  
467 neural mass modeling of triphasic wave-like generalized periodic discharges with a high  
468 negative component (Tri-HNC). *Psychiatry Clin Neurosci* 73: 34-42, 2019.
- 469 13. **Forgue ST, Kari P, and Barbhaiya R.** N-oxidation of N-methylpyrrolidine released in vivo  
470 from cefepime. *Drug Metab Dispos* 15: 808-815, 1987.
- 471 14. **Fishman RA.** Blood-brain and CSF barriers to penicillin and related organic acids. *Arch*  
472 *Neurol* 15: 113-124, 1966.
- 473 15. **Avedissian SN, Pais G, Joshi MD, Rhodes NJ, Scheetz MH.** A translational  
474 pharmacokinetic rat model of cerebral spinal fluid and plasma concentrations of cefepime.  
475 *Mosphere* 4: 2019.
- 476 16. **Tsai YH, Bies M, Leitner F, Kessler RE.** Therapeutic studies of cefepime (BMY 28142) in  
477 murine meningitis and pharmacokinetics in neonatal rats. *Antimicrob Agents Chemother* 34:  
478 733–738, 1990.
- 479 17. **Tauber MG, Hackbarth CJ, Scott KG, Rusnak MG, Sande MA.** New cephalosporins  
480 cefotaxime, cefpimizole, BMY 28142, and HR 810 in experimental pneumococcal  
481 meningitis in rabbits. *Antimicrob Agents Chemother* 27:340 –342, 1985.



- 482 18. **Lodise TP, Jr, Rhoney DH, Tam VH, McKinnon PS, Drusano GL.** Pharmacodynamic  
483 profiling of cefepime in plasma and cerebrospinal fluid of hospitalized patients with external  
484 ventriculostomies. *Diagn Microbiol Infect Dis* 54: 223–230, 2006.
- 485 19. **Chatellier D, Jourdain M, Mangalaboyi J, Ader F, Chopin C, Derambure P, Fourrier F.**  
486 Cefepime-induced neurotoxicity: an underestimated complication of antibiotherapy in  
487 patients with acute renal failure. *Intensive Care Med* 28: 214-217, 2002.
- 488 20. **Payne LE, Gagnon DJ, Riker RR, Seder DB, Glisic EK, Morris JG, Fraser GL.**  
489 Cefepime-induced neurotoxicity: a systematic review. *Crit Care* 21: 276, 2017.
- 490 21. **Rhodes NJ, Kuti JL, Nicolau DP, Neely MN, Nicasio AM, and Scheetz MH.** An  
491 exploratory analysis of the ability of a cefepime trough concentration greater than 22 mg/L to  
492 predict neurotoxicity. *J Infect Chemother* 22(2): 78–83, 2016.
- 493 22. **Sugimoto M, Uchida I, Mashimo T, Yamazaki S, Hatano K, Ikeda F, Mochizuki Y,**  
494 **Terai T, Matsuoka N.** Evidence for the involvement of GABA(A) receptor blockade in  
495 convulsions induced by cephalosporins. *Neuropharmacology* 45: 304-314, 2003.
- 496 23. **De Sarro A, Ammendola D, Zappala M, Grasso S, De Sarro GB.** Relationship between  
497 structure and convulsant properties of some beta-lactam antibiotics following  
498 intracerebroventricular microinjection in rats. *Antimicrob Agents Chemother* 39: 232-237,  
499 1995.
- 500 24. International Conference on Harmonisation; Guidance on M3(R2) Nonclinical Safety Studies  
501 for the Conduct of Human Clinical Trials and Marketing Authorization for Pharmaceuticals;  
502 availability. Notice. *Fed Regist* 75: 3471-3472, 2010.
- 503 25. **Tanaka A, Takechi K, Watanabe S, Tanaka M, Suemaru K, Araki H.** Convulsive  
504 liability of cefepime and meropenem in normal and corneal kindled mice. *Antimicrob Agents*  
505 *Chemother* 58: 4380-4383, 2014.
- 506 26. **Ullah S, Beer R, Fuhr U, et al.** Brain Exposure to Piperacillin in Acute Hemorrhagic Stroke  
507 Patients Assessed by Cerebral Microdialysis and Population Pharmacokinetics. *Neurocrit*  
508 *Care* 33: 740–748, 2020.
- 509 27. **Liu X, Wei Q, Yang X, Wang X, Zhang J, Xu R, Zhang H, Wang S, Wan X, Jiang L, He**  
510 **Y, Li S, Chen R, Wang Y, Chen Y, Qin F, Chen Y, Dai Y, Li H, Zhao Y, Cen X.**  
511 Lipidomics Reveals Dysregulated Glycerophospholipid Metabolism in the Corpus Striatum  
512 of Mice Treated with Cefepime. *ACS Chem Neurosci* 12(23): 4449–4464, 2021.
